# Supplementary material for: Short-term amino acid infusion improves protein balance in critically ill patients
Source: Springer Nature journal article supplement (doi:10.1186/s13054-015-0844-6), 2015-03-09
Supplement: MOESM2 [file 9780310]

Supplementary file 2:

Plasma amino acid concentrations ( $\mu\text{mol/L}$ ) in critically ill patients at baseline (basal) and after 3 hours extra parenteral amino acids (Glavamin, Fresenius-Kabi; equivalent of 1 g/kg/day). On the first study day, 13 patients were studied and on the second study day 7 of these were still treated in the ICU and studied again.

|                   | <u>First Study day</u> |           |             |           | <u>Second Study day</u> |           |             |           | <u>Statistics (P= ;Paired t-test)</u> |                       |
|-------------------|------------------------|-----------|-------------|-----------|-------------------------|-----------|-------------|-----------|---------------------------------------|-----------------------|
|                   | <u>Basal</u>           |           | <u>AA</u>   |           | <u>Basal</u>            |           | <u>AA</u>   |           | <u>First</u>                          | <u>Second</u>         |
|                   | <u>Mean</u>            | <u>SD</u> | <u>Mean</u> | <u>SD</u> | <u>Mean</u>             | <u>SD</u> | <u>Mean</u> | <u>SD</u> | <u>Basal vers. AA</u>                 | <u>Basal vers. AA</u> |
| Glutamate         | 65.0                   | 15.8      | 71.2        | 11.7      | 69.3                    | 15.5      | 67.1        | 21.3      | 0.4906                                | 0.7874                |
| Serine            | 44.9                   | 12.5      | 49.8        | 13.4      | 47.6                    | 9.5       | 47.9        | 11.5      | 0.2349                                | 0.4743                |
| Asparagine        | 68.1                   | 14.7      | 88.7        | 21.0      | 73.1                    | 9.6       | 91.8        | 22.5      | 0.0081                                | 0.2271                |
| Glutamine         | 442.7                  | 45.2      | 532.6       | 88.7      | 499.5                   | 115.0     | 563.5       | 165.2     | 0.0226                                | 0.6739                |
| Histidine         | 60.6                   | 12.5      | 87.2        | 18.0      | 57.8                    | 4.4       | 72.1        | 9.7       | 0.0171                                | 0.2179                |
| Glycine           | 154.8                  | 29.0      | 189.7       | 40.6      | 179.9                   | 61.9      | 228.5       | 105.4     | 0.0053                                | 0.2326                |
| Threonine         | 87.4                   | 22.4      | 158.7       | 28.4      | 92.1                    | 18.0      | 164.8       | 43.9      | 0.0014                                | 0.0649                |
| 3-Methylhistidine | 7.0                    | 3.6       | 6.9         | 4.8       | 6.7                     | 3.8       | 7.2         | 4.3       | 0.9376                                | 0.0503                |
| Citrulline        | 18.1                   | 1.5       | 21.5        | 3.7       | 20.0                    | 5.1       | 23.4        | 10.7      | 0.0316                                | 0.5195                |
| Arginine          | 62.6                   | 18.0      | 102.8       | 30.1      | 75.6                    | 14.1      | 119.4       | 33.8      | 0.0030                                | 0.1057                |
| Alanine           | 230.4                  | 64.7      | 301.0       | 104.7     | 222.0                   | 47.9      | 295.5       | 90.3      | 0.0239                                | 0.1963                |
| Taurine           | 58.8                   | 19.6      | 58.6        | 31.7      | 80.1                    | 20.2      | 59.8        | 19.9      | 0.9807                                | 0.3799                |
| Tyrosine          | 85.3                   | 13.4      | 103.2       | 13.9      | 77.7                    | 3.4       | 92.2        | 7.5       | 0.0098                                | 0.1611                |
| Valine            | 218.0                  | 33.0      | 293.3       | 51.4      | 252.7                   | 27.9      | 331.2       | 64.8      | 0.0078                                | 0.0935                |
| Methionine        | 26.5                   | 11.0      | 46.4        | 16.7      | 27.9                    | 7.4       | 49.0        | 10.7      | 0.0042                                | 0.0279                |
| Tryptophane       | 28.8                   | 7.8       | 38.2        | 9.4       | 33.4                    | 9.8       | 39.1        | 15.4      | 0.0174                                | 0.3529                |
| Phenylalanine     | 149.1                  | 66.3      | 189.6       | 64.7      | 150.6                   | 22.7      | 171.8       | 5.4       | 0.0078                                | 0.1893                |
| Isoleucine        | 50.2                   | 8.0       | 77.4        | 15.5      | 62.6                    | 12.9      | 88.2        | 16.5      | 0.0085                                | 0.0402                |
| Ornithine         | 65.6                   | 36.2      | 92.7        | 49.4      | 56.7                    | 6.4       | 67.6        | 6.8       | 0.0198                                | 0.0903                |
| Leucine           | 103.7                  | 17.5      | 138.4       | 24.3      | 118.2                   | 7.6       | 150.1       | 17.1      | 0.0150                                | 0.0884                |
| Lysine            | 157.9                  | 38.5      | 213.5       | 53.1      | 172.9                   | 31.3      | 230.1       | 54.5      | 0.0072                                | 0.1746                |
| BCAA              | 360.4                  | 96.2      | 526.9       | 172.2     | 383.2                   | 74.8      | 524.2       | 91.8      | 0.0000                                | 0.0024                |
| SUM               | 1913.0                 | 533.5     | 2621.0      | 785.0     | 2141.5                  | 392.9     | 2665.0      | 714.3     | 0.0000                                | 0.0058                |
